# Supplementary material for: Complete genome sequence and comparative genomic analyses of the vancomycin-producing Amycolatopsis orientalis
Source: PubMed Central journal article supplement (PMC4048454; doi:10.1186/1471-2164-15-363), 2014-05-13
Supplement: 12864_2013_6095_MOESM1_ESM.pdf [file 12864_2013_6095_MOESM1_ESM.pdf]

## **Additional files**

### **Complete genome sequence and comparative genomic analyses of the vancomycin-producing *Amycolatopsis orientalis***

Li Xu<sup>1,2\*</sup>, He Huang<sup>3\*</sup>, Wei Wei<sup>2\*</sup>, Yi Zhong<sup>3#</sup>, Biao Tang<sup>4</sup>, Hua Yuan<sup>3</sup>, Li Zhu<sup>2</sup>,  
Weiyi Huang<sup>1</sup>, Mei Ge<sup>2</sup>, Shen Yang<sup>3</sup>, Huajun Zheng<sup>5</sup>, Weihong Jiang<sup>3§</sup>, Daijie  
Chen<sup>2,6§</sup>, Guo-Ping Zhao<sup>3,4,5,7§</sup>, Wei Zhao<sup>3,4,8,9§</sup>

\*These authors contributed equally to this work

#Current address: Computational Biology Center, Memorial Sloan Kettering Cancer  
Center, New York, NY 10065, United States.

§Corresponding authors: W.Z.: [181zhao@163.com](mailto:181zhao@163.com); G-P.Z.: [gpzhao@sibs.ac.cn](mailto:gpzhao@sibs.ac.cn); D.C.:  
[hccb001@163.com](mailto:hccb001@163.com); W.J.: [whjiang@sibs.ac.cn](mailto:whjiang@sibs.ac.cn)

## **Supplementary Materials and Methods**

### **Total DNA extraction**

Spores of *Amycolatopsis orientalis* HCCB10007 were inoculated into a 250 ml-baffled flask containing 25 ml TSB (Tryptone Soya Broth, 30g L<sup>-1</sup>) medium and cultivated at 28 °C, 220 rpm for 32 h. The cells were harvested and the genomic DNA was extracted directly from the expanded culture for 454 sequencing.

### **Scanning electron microscopy**

*A.orientalis* HCCB10007 was cultured on Gause medium (amidulin 20 g L<sup>-1</sup>, NaCl 0.5 g L<sup>-1</sup>, K<sub>2</sub>HPO<sub>4</sub> 0.5 g L<sup>-1</sup>, KNO<sub>3</sub> 1.0 g L<sup>-1</sup>, MgSO<sub>4</sub>·7H<sub>2</sub>O 0.5 g L<sup>-1</sup>, FeSO<sub>4</sub>·7H<sub>2</sub>O 0.01 g L<sup>-1</sup> agar 20 g L<sup>-1</sup>) covered with cellophane, the cells on which were fixed with fresh 2% glutaraldehyde (pH 7.2) and 1% osmium tetroxide after 1-day or 3-days incubation at 28 °C. After dehydration, ethanol was replaced by amyl acetate. The samples were then dried in HCP-2 (Hitachi, Tokyo, Japan) using the supercritical drying method, subsequently coated with gold by Fine Coater JFC-1600 (Jeol, Tokyo, Japan), and then examined with a JSM-6360LV scanning electron microscopy (SEM; Jeol).

### **RNA isolation and reverse transcription PCR**

*A. orientalis* HCCB10007 spores were inoculated into a 250 ml-baffled flask containing 25 ml seed medium and cultivated at 28 °C and 220 rpm for 44 h, which then transferred to the fermentation medium F1 or the nutrient medium F5 at 28 °C and 220 rpm for 48 h. The seed medium contains glycerol (20g L<sup>-1</sup>), amidulin (40 g L<sup>-1</sup>), soybean flour (20 g L<sup>-1</sup>), glucose (15 g L<sup>-1</sup>), KNO<sub>3</sub> (6 g L<sup>-1</sup>), KH<sub>2</sub>PO<sub>4</sub> (0.2 g L<sup>-1</sup>), MgCl<sub>2</sub>·6H<sub>2</sub>O (0.4 g L<sup>-1</sup>). The fermentation medium F1 contains glycerol (20 g L<sup>-1</sup>), soybean flour (20 g L<sup>-1</sup>), KNO<sub>3</sub> (6 g L<sup>-1</sup>), KH<sub>2</sub>PO<sub>4</sub> (0.2 g L<sup>-1</sup>), MgCl<sub>2</sub>·6H<sub>2</sub>O (0.4 g L<sup>-1</sup>),

CaCO<sub>3</sub> (3 g L<sup>-1</sup>), while the composition of nutrient medium F5 is the same as that of the F1 except that yeast extract is instead of soybean flour.

*A. orientalis* HCCB10007 total RNA was isolated from the F1 or F5 medium according to the description for streptomycetes elsewhere. The quantity of RNA was examined by denaturing formamide agarose gel electrophoresis. One microgram of RNA was used to synthesize cDNA in a total volume of 10 µl using the SuperScript<sup>TM</sup> III Reverse Transcriptase (Invitrogen, California, USA). After incubation of 1 h at 50 °C, 1 µl of the cDNA reaction mixture was used as the template for the following PCR.

#### **The culture conditions for *A. orientalis* HCCB10007 and other mutant strains**

The culture conditions were the same for *A. orientalis* and all the mutants. Spores were inoculated into a 250 ml-baffled flask containing 25 ml seed medium and cultivated at 28 °C and 220 rpm for 48 h, which then transferred (8% inoculum dose) to the fermentation medium at 28 °C and 220 rpm for 120 h.

**The seed medium** contains glycerol (20 g L<sup>-1</sup>), amidulin (40 g L<sup>-1</sup>), soybean flour (20 g L<sup>-1</sup>), glucose (15 g L<sup>-1</sup>), KNO<sub>3</sub> (6 g L<sup>-1</sup>), KH<sub>2</sub>PO<sub>4</sub> (0.2 g L<sup>-1</sup>), MgCl<sub>2</sub>·6H<sub>2</sub>O (0.4 g L<sup>-1</sup>).

**The fermentation medium** (PH6.5) contains glycerol (20 g L<sup>-1</sup>), soybean flour (20 g L<sup>-1</sup>), KNO<sub>3</sub> (6 g L<sup>-1</sup>), KH<sub>2</sub>PO<sub>4</sub> (0.2 g L<sup>-1</sup>), MgCl<sub>2</sub>·6H<sub>2</sub>O (0.4 g L<sup>-1</sup>), CaCO<sub>3</sub> (3 g L<sup>-1</sup>).

#### **The nuclear magnetic resonance (NMR) analysis of dimethylvancomycin and dimethylglucovancomycin**

For dimethylvancomycin (40 mg ml<sup>-1</sup>), <sup>1</sup>H-NMR was measured at 500 MHz in D<sub>2</sub>O, and <sup>13</sup>C-NMR was measured at 125 MHz in D<sub>2</sub>O. For dimethylglucovancomycin (40 mg ml<sup>-1</sup>), <sup>1</sup>H-NMR was measured at 400 MHz in DMSO-*d*<sub>6</sub>, and <sup>13</sup>C-NMR was measured at 100 MHz in DMSO-*d*<sub>6</sub>. The <sup>1</sup>H and <sup>13</sup>C

NMR spectra were recorded on Bruker Avance-400 spectrometer with TMS as an internal standard.

### Primers used for RT-PCR

---

#### Cluster primers

---

|        |                        |
|--------|------------------------|
| nrps3F | CAGATTCACCGGGACCGTCG   |
| nrps3R | TCGGCCTCCTTCGCGTACA    |
| nrps4F | ACCGTCGGGTGGTTCACC     |
| nrps4R | ACCAGTCGGTCGCTTCGGG    |
| nrps7F | GCCGTGGCGGTTCGATCTGGA  |
| nrps7R | TCGCTCGCGTGGTCACCCTG   |
| n_p1F  | GCAACGTCTGGGATCGCGCT   |
| n_p1R  | ACGTAGGCGAGCCCGATCCC   |
| n_p2F  | ATTCAAGCAGCCGGTCCAGG   |
| n_p2R  | ACCTGCTGGTTCGGATTGGCC  |
| n_p3F  | GCCACGGCGGTGGTGA ACTA  |
| n_p3R  | ACCACACGTCCGTCCGCCAT   |
| pks3F  | GGGAAACCGGCGCACGAGA    |
| pks3R  | ATCAGCAACACCGGCCCGG    |
| pks5F  | GCCGAAGAAGGCGAGGAGGTCG |
| pks5R  | ACGCTGGTGCCGGAGCACAC   |
| pks9F  | CTCGCCCCAGTTCATCAACG   |
| pks9R  | CAACCGGGTGATCCTGTTCG   |
| vcmF   | GCCGACTACCTCGCGCAGAT   |
| vcmR   | CCAGAGATTGCGCATGACCG   |
| ecoF   | TCCTGGTGGCCCACTCCTCT   |
| ecoR   | TGATCCCCCTCGACGTCCAC   |

---

### Primers used for amplifying the DNA sequences of unique gene in different strains

---

|                   |                      |
|-------------------|----------------------|
| ForAORI_2733-C-F: | TGGACGCACTACTCGATCGC |
| ForAORI_2733-C-R: | TACTGGCTGCACCACCACAT |

---

## Primers used for gene inactivation and checking

| Gene     | Primers                                                                         |
|----------|---------------------------------------------------------------------------------|
| vmtF     | GGCCTGAGACGAATGTCGACCTGGAGGTTGTCCTGATG <u>GATTCCGGG</u><br><u>GATCCGTCGACC</u>  |
| vmtR     | TGATCGAGGAGGGCGTGAGCAGGCTCGCCGCGCTCATCAT <u>GTAGGCT</u><br><u>GGAGCTGCTTC</u>   |
| vmt-C-F  | CGAACTCCCGGAAGGATTCC                                                            |
| vmt-C-R  | ATGAGCTCAGCCAATCGA                                                              |
| VhalF    | GCGCCGTGGCTGTGCGGTGAGCGGGGAAGGACCATCATG <u>GATTCCGGGGA</u><br><u>TCCGTCGACC</u> |
| vhalR    | CGAACAGGGCCGGTGTCTGTGGCCGCCGAAAAACGGTCAT <u>GTAGGCTGG</u><br><u>AGCTGCTTC</u>   |
| vhal-C-F | AAGGTACGGTCACCGCAGTG                                                            |
| vhal-C-R | ATGAGCTCAGCCAATCGA                                                              |
| gtfDF    | TGCGCCGGTGGTCGAGCACGAAACAGGGGTAGCGAAATG <u>GATTCCGG</u><br><u>GGATCCGTCGACC</u> |
| gtfDR    | TTCTCCGGTCCTGGCCGGCGTCCGGTCGCTGATGGTTCA <u>GTAGGCTG</u><br><u>GAGCTGCTTC</u>    |
| gtfD-C-F | CCGTCGACAAGATGGCGAC                                                             |
| gtfD-C-R | ATGAGCTCAGCCAATCGA                                                              |
| gtfEF    | CGCCGGCCAGGACCGGAGAAAACGGGGAAATACGTGATG <u>GATTCCGGGG</u><br><u>ATCCGTCGACC</u> |
| gtfER    | GTGGTCGACATGCGGTCTCCTCTGTACTGGTGATGATCAT <u>GTAGGCTGGA</u><br><u>GCTGCTTC</u>   |
| gtfE-C-F | GGAACACCGACCAGCCGTAC                                                            |
| gtfE-C-R | ATGAGCTCAGCCAATCGA                                                              |

\*The nucleotides underlined are primers for antibiotics resistance gene amplification.

## Primers used for Vmt expression

| Primers |                          |
|---------|--------------------------|
| vmt-E-F | CATATGACCGATCAACTGGACCGC |
| vmt-E-R | AAGCTTCTTCGCGTCTGCCGTGAC |

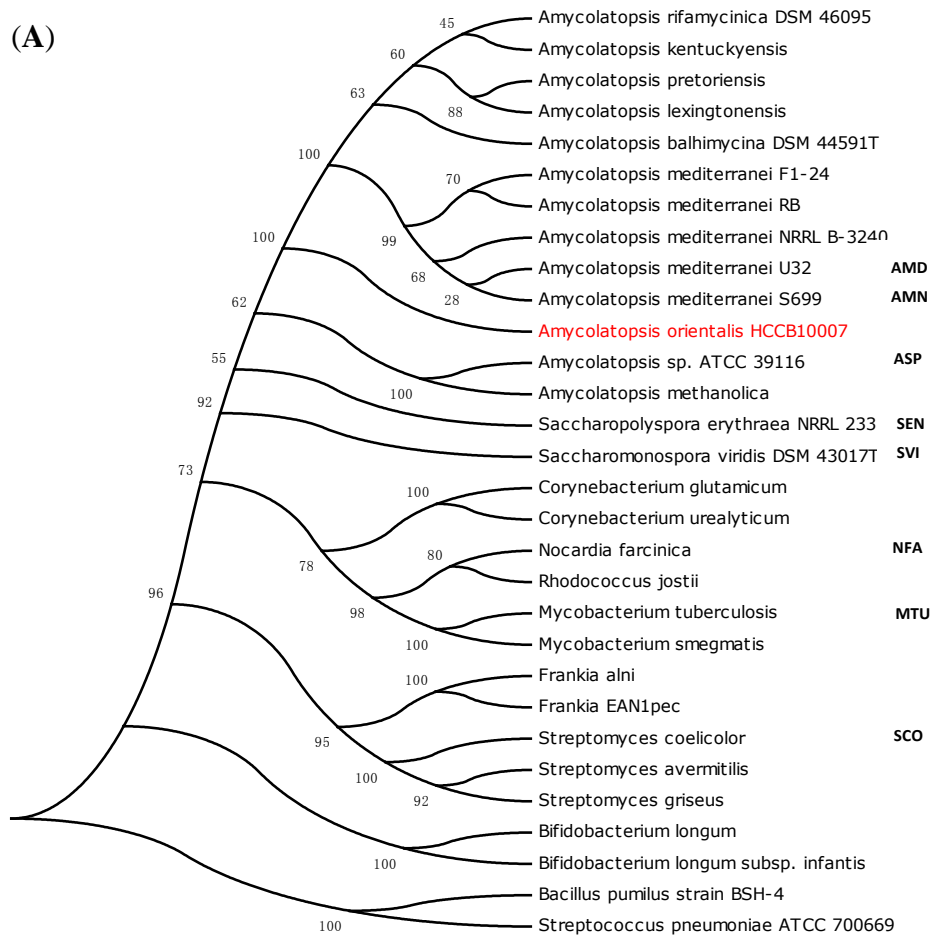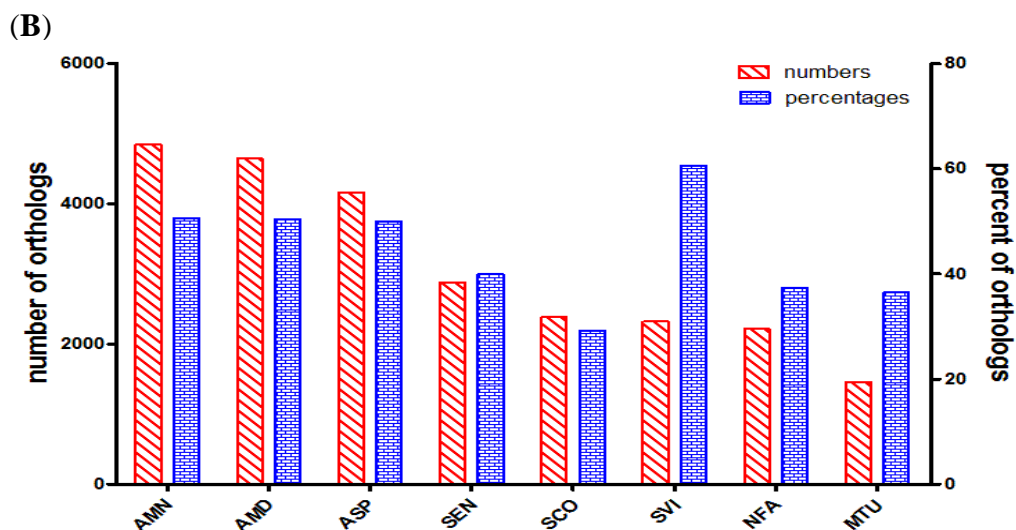

**Figure S1. (A) Phylogeny tree based on 16S ribosome RNA of selected actinobacteria and other related species. (B) Comparative analyses of the orthologs between different actinomycete genomes. The orthologs of *A. orientalis* are shared with *A. mediterranei* S699 (AMN), *A. mediterranei* U32 (AMD), *A. sp* (ASP), *S. erythraea* (SEN), *S. coelicolor* (SCO), *S. viridis* (SVI), *N. farcinica* (NFA),**

and *M. tuberculosis* (MTU). The red bars represent the number of orthologs (left vertical axis), and the blue bars represent the percentages of orthologs in each species (right vertical axis). All the sequences (including the 16S ribosome RNA) were obtained from NCBI at <http://www.ncbi.nlm.nih.gov/>.

**Table S1. The comparison of 16S rRNA between and in *A. orientalis* (four sequences: #1, #2, #3, #4) and *A. mediterranei* (four sequences: #a, #b, #c, #d) genomes**

|               |            |                           | Serial number             | #1        | #2        | #3         | #4        | #a       | #b       | #c         | #d         |
|---------------|------------|---------------------------|---------------------------|-----------|-----------|------------|-----------|----------|----------|------------|------------|
|               |            |                           | location                  | core      | core      | quasi-core | core      | core     | core     | quasi-core | quasi-core |
|               |            |                           | Transcriptional direction | +         | +         | -          | -         | +        | +        | -          | -          |
| Serial number | location   | Transcriptional direction |                           | AORI_R016 | AORI_R022 | AORI_R041  | AORI_R045 | AMED_R16 | AMED_R25 | AMED_R39   | AMED_R49   |
| #a            | core       | +                         | AMED_R16                  | 97.20     | 97.20     | 97.20      | 97.20     | 100.00   |          |            |            |
| #b            | core       | +                         | AMED_R25                  | 97.27     | 97.20     | 97.20      | 97.20     | 99.93    | 100.00   |            |            |
| #c            | quasi-core | -                         | AMED_R39                  | 97.13     | 97.13     | 97.13      | 97.13     | 99.93    | 99.86    | 100.00     |            |
| #d            | quasi-core | -                         | AMED_R49                  | 97.13     | 97.13     | 97.13      | 97.13     | 99.93    | 99.86    | 100.00     | 100.00     |
| #1            | core       | +                         | AORI_R016                 | 100.00    |           |            |           |          |          |            |            |
| #2            | core       | +                         | AORI_R022                 | 98.91     | 100.00    |            |           |          |          |            |            |
| #3            | quasi-core | -                         | AORI_R041                 | 99.04     | 98.63     | 100.00     |           |          |          |            |            |
| #4            | core       | -                         | AORI_R045                 | 99.04     | 98.63     | 100.00     | 100.00    |          |          |            |            |



**Table S2: The *P*-values derived from grouped t test for the coding densities of orthologs or essential genes comparing the core (or R1, or R2) region against the non-core regions under the conditions of different sliding window sizes\*.**

| Gene category for comparison | window size | <i>P</i> values for the comparisons |                            |                                |
|------------------------------|-------------|-------------------------------------|----------------------------|--------------------------------|
|                              |             | core vs non-core                    | R1 vs non-core             | R2 vs non-core                 |
| orthologs                    | 90kb        | 4.34*1e-10<br>(sample: 63 vs 30)    | 0.011<br>(sample: 3 vs 30) | 2.2*6e-05<br>(sample: 3 vs 30) |
| essential genes              | 90kb        | 5.1*1e-04<br>(sample: 63 vs 30)     | 0.14<br>(sample: 3 vs 30)  | 0.17<br>(sample: 3 vs 30)      |
| essential genes              | 45kb        | 8.5*1e-05<br>(sample: 127 vs 61)    | 0.051<br>(sample: 5 vs 61) | 0.046<br>(sample: 5 vs 61)     |

\*Refer to the *Methods* for details.

**Table S3. Enzymes in different actinomycetes involved in the pathway of incorporating arabinose into the cell wall (Note: "✓", present in the microorganism; "-", absent in the microorganism)**

| Enzymes<br>Species                                              | Transketolase | Phosphoribosyl<br>pyrophosphate synthetase | 5-phosphoribosyl<br>transferase | Phospholipid<br>phosphatase | Epimerase1 | Epimerase2 |
|-----------------------------------------------------------------|---------------|--------------------------------------------|---------------------------------|-----------------------------|------------|------------|
| <i>Nocardia farcinica</i> IFM 10152                             | ✓             | ✓                                          | ✓                               | ✓                           | ✓          | ✓          |
| <i>Mycobacterium tuberculosis</i> H37Rv                         | ✓             | ✓                                          | ✓                               | ✓                           | ✓          | ✓          |
| <i>Saccharopolyspora erythraea</i> NRRL23338                    | ✓             | ✓                                          | ✓                               | ✓                           | ✓          | ✓          |
| <i>Corynebacterium glutamicum</i> ATCC 13032                    | ✓             | ✓                                          | ✓                               | ✓                           | ✓          | ✓          |
| <i>Rhodococcus jostii</i> RHA1                                  | ✓             | ✓                                          | ✓                               | ✓                           | ✓          | ✓          |
| <i>Amycolatopsis mediterranei</i> U32                           | AMED_2809     | AMED_8235                                  | AMED_0226                       | AMED_0225                   | AMED_0230  | AMED_0229  |
| <i>Amycolatopsis mediterranei</i> S699                          | RAM_14275     | RAM_42295                                  | RAM_01145                       | RAM_01140                   | RAM_01165  | RAM_01160  |
| <i>Amycolatopsis orientalis</i><br>HCCB10007                    | AORI_2796     | AORI_7026                                  | AORI_0229                       | AORI_0228                   | AORI_0235  | AORI_0234  |
| <i>Streptomyces. albus</i> J1074                                | ✓             | ✓                                          | -                               | -                           | -          | -          |
| <i>Streptomyces avermitilis</i> MA-4680                         | ✓             | ✓                                          | -                               | -                           | -          | ✓          |
| <i>Streptomyces clavuligerus</i> ATCC<br>27064                  | ✓             | ✓                                          | -                               | -                           | -          | -          |
| <i>Streptomyces coelicolor</i> A3(2)                            | ✓             | ✓                                          | ✓                               | ✓                           | ✓          | ✓          |
| <i>Streptomyces flavogriseus</i> ATCC<br>33331                  | ✓             | ✓                                          | -                               | -                           | ✓          | ✓          |
| <i>Streptomyces ghanaensis</i> ATCC 14672                       | ✓             | ✓                                          | ✓                               | -                           | ✓          | -          |
| <i>Streptomyces griseoflavus</i> Tu4000                         | ✓             | ✓                                          | ✓                               | -                           | ✓          | ✓          |
| <i>Streptomyces griseus</i> subsp. <i>griseus</i><br>NBRC 13350 | ✓             | ✓                                          | -                               | -                           | ✓          | ✓          |
| <i>Streptomyces hygroscopicus</i> ATCC<br>53653                 | ✓             | ✓                                          | -                               | -                           | -          | -          |
| <i>Streptomyces lividans</i> TK24                               | ✓             | ✓                                          | -                               | -                           | -          | ✓          |
| <i>Streptomyces pristinaespiralis</i> ATCC<br>25486             | ✓             | ✓                                          | -                               | -                           | -          | -          |
| <i>Streptomyces</i> sp. ACTE                                    | ✓             | ✓                                          | -                               | -                           | ✓          | ✓          |
| <i>Streptomyces</i> sp. C                                       | ✓             | ✓                                          | -                               | -                           | -          | -          |
| <i>Streptomyces</i> sp. Mg1                                     | ✓             | ✓                                          | -                               | -                           | -          | -          |
| <i>Streptomyces</i> sp. SPB74                                   | ✓             | ✓                                          | -                               | -                           | -          | -          |
| <i>Streptomyces</i> sp. SPB78                                   | ✓             | ✓                                          | -                               | -                           | -          | -          |
| <i>Streptomyces sviceps</i> ATCC 29083                          | ✓             | ✓                                          | -                               | -                           | ✓          | ✓          |
| <i>Streptomyces viridochromogenes</i> DSM<br>40736              | ✓             | ✓                                          | ✓                               | -                           | ✓          | ✓          |

Note: Genes (*AORI\_2796*, *AORI\_7026*, *AORI\_0228-0229*, *AORI\_0234-0235*) coding for enzymes involved in incorporating arabinose into the cell wall were found throughout the genome of *A. orientalis*. These genes can also be found in other arabinose-containing species in addition to *A. mediterranei*, such as *Mycobacterium tuberculosis*, *Nocardia farcinica* and *S. erythraea*, but not in the arabinose-deficiency *Streptomyces* species (except *S. coelicolor* A3(2)).

**Table S4. Genes characterized in different actinomycetes responsible for recruiting glycine residues crossbridging to the peptidoglycan lateral chains (Note: "--", absent in the microorganism)**

| <b>Species</b> \ <b>Genes</b>      | <i>femA</i> (the second and third glycine) | <i>femB</i> (the fourth and fifth glycine) | <i>fmhB</i> (the first glycine) |
|------------------------------------|--------------------------------------------|--------------------------------------------|---------------------------------|
| <i>Staphylococcus aureus</i>       | SA1206                                     | SA1207                                     | SA2057                          |
| <i>Streptomyces coelicolor</i>     | SCO3593                                    | SCO3904                                    | SCO0602                         |
| <i>Nocardia farcinica</i>          | --                                         | --                                         | --                              |
| <i>Saccharopolyspora erythraea</i> | --                                         | --                                         | --                              |
| <i>Amycolatopsis mediterranei</i>  | --                                         | --                                         | --                              |
| <i>Amycolatopsis orientalis</i>    | --                                         | --                                         | --                              |

Note: Similar to that of *A. mediterranei*, none of genes (*femA*, *femB* and *fmhB*) responsible for recruiting glycine residues cross-bridging to the peptidoglycan lateral chains exist in *A. orientalis*.

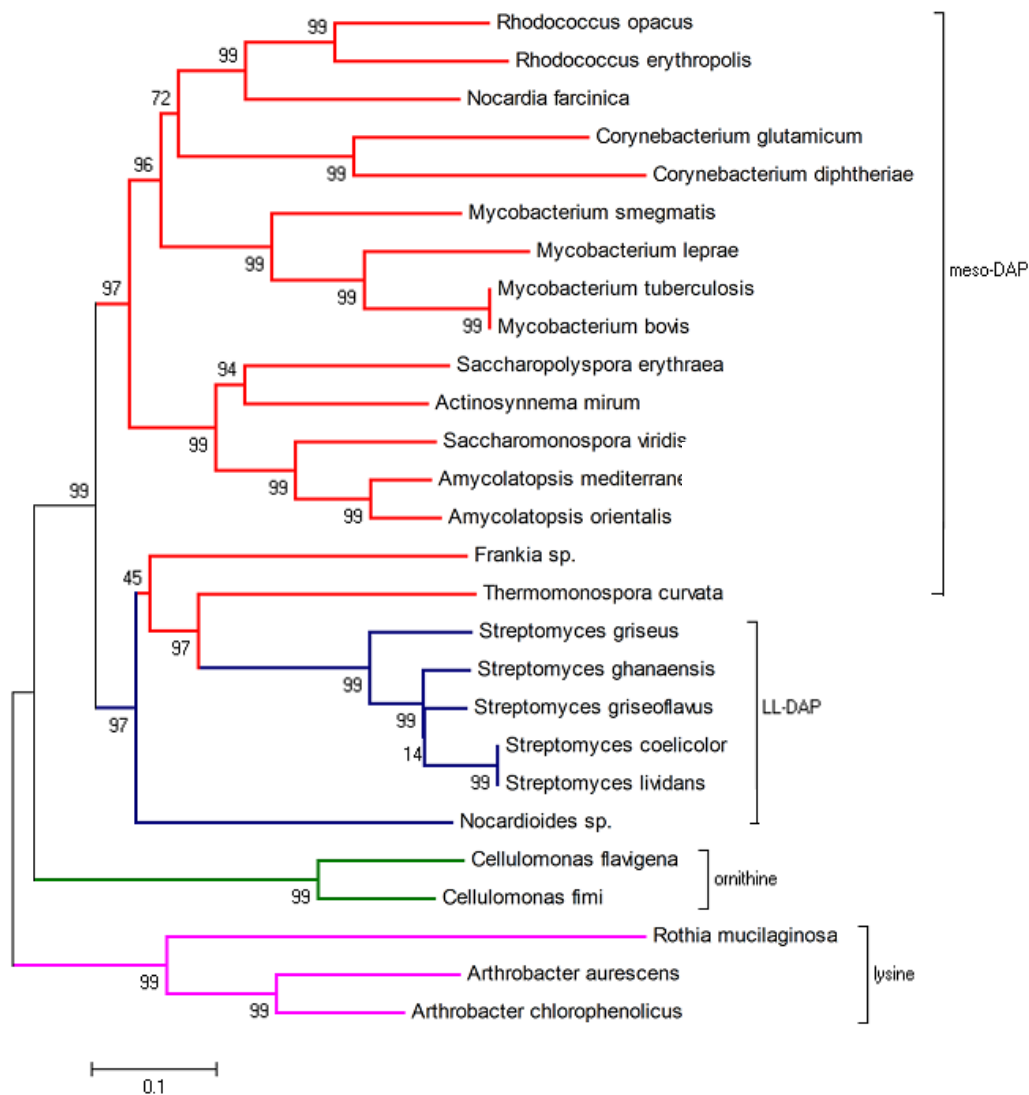

**Figure S2. Phylogenetic analyses of MurE in actinomycetes.** The amino acid sequences of the MurE are from 27 selected species color-coded based on their special amino acid compositions of corresponding peptidoglycan: red, containing *meso*-diaminopimelic acid (DAP); blue, containing LL-DAP; green, containing lysine; pink, containing ornithine. The numbers on the internal branches are the percentage of bootstrap probability. The protein sequences were obtained from NCBI at <http://www.ncbi.nlm.nih.gov/protein/>. The phylogenetic relationship of the MurE protein from *A. orientalis* (AORI\_2293) presents close relationship with those from *A. mediterranei* and *S. erythraea*, both of which synthesize cell wall using *meso*-DAP as the substrate. It is clearly distinguished from that of streptomycetes where LL-DAP is used as the substrate.

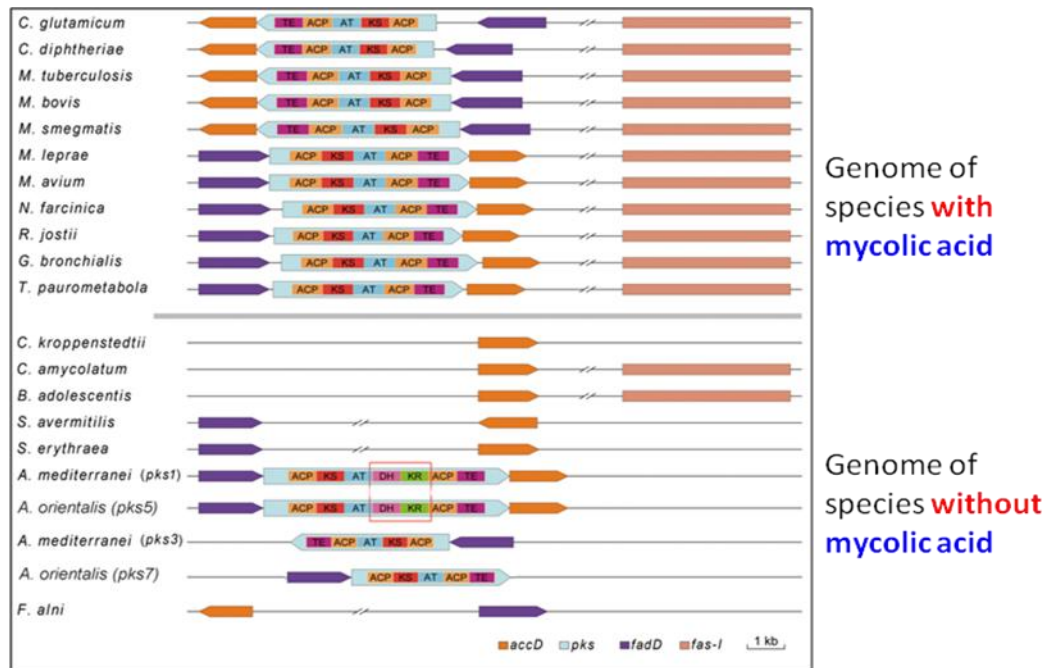

**Figure S3. Genetic organization of the *fadD-pks-accD* and *fas-I* gene clusters in 20 selected actinobacterial genomes.** The result was obtained by BLASTP using FadD32-PKS13-AccD4 and Fas-I of *M. tuberculosis* H37Rv as the query sequences. 11 strains above the gray bar are mycolic acids-containing bacteria that harbor both *fadD-pks-accD* clusters and *fas-I* genes. The remaining seven strains lack the mycolic acids in their cell envelope. The genomes used are as follow: *Corynebacterium glutamicum* ATCC 13032 (NC\_003450), *Corynebacterium diphtheriae* NCTC 13129 (NC\_002935), *M. tuberculosis* H37Rv (NC\_000962), *Mycobacterium bovis* AF2122/97 (NC\_002945), *Mycobacterium smegmatis* str. MC2 155 (NC\_008596), *M. leprae* TN (NC\_002677), *Mycobacterium avium* 104 (NC\_008595), *Nocardia farcinica* IFM 10152 (NC\_006361), *Rhodococcus jostii* RHA1 (NC\_008268), *Gordonia bronchialis* DSM 43247 (NC\_013441), *Tsukamurella paurometabola* DSM 20162 (NZ\_ABVA000000000), *Corynebacterium kroppenstedtii* DSM 44385 (NC\_012704), *Corynebacterium amycolatum* SK46 (NZ\_ABZU000000000), *Bifidobacterium adolescentis* ATCC 15703 (NC\_008618), *Streptomyces avermitilis* MA-4680 (NC\_003155), *Saccharopolyspora erythraea* NRRL 2338 (NC\_009142), *Amycolatopsis mediterranei* U32 (NC\_014318), *Frankia alni* ACN14a (NC\_008278). This analysis indicates that, no authentic gene cluster of *fadD-pks-accD* critical for synthesizing mycolic acid component was found in the whole genome of *A. orientalis*, nor in the genome of *A. mediterranei*. It confirmed the characteristic phenotype of lacking mycolic acid in the cell wall of genus *Amycolatopsis*.

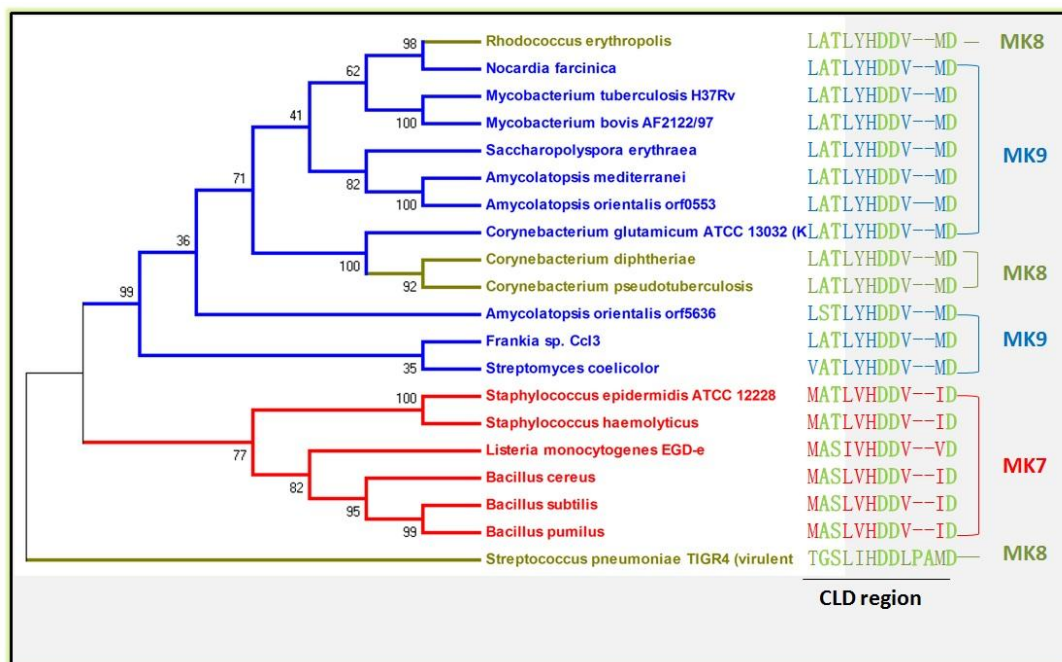

**Figure S4. phylogenetic analysis of isoprenyl diphosphate synthases from type strains of actinomycetes using the MP method.** The names and amino acid sequences of the strains with different colors represent actinomycetes harboring different-length MKs: red, MK7 (C35); olive-green, MK8 (C40); blue, MK9 (C45). The amino acid sequences of the chain-length determination (CLD) region are emphasized in green on the right of the panel. The protein sequences were obtained from NCBI at <http://www.ncbi.nlm.nih.gov/protein/>.

**Table S5. The orthologs of key CDSs for secondary metabolite biosynthesis in *A.orientalis* HCCB10007 genome compared with the NCBI database.**

| <i>A. orientalis</i> HCCB10007         |                   |            |                                                       |                               | Best hits in the NCBI database  |                                             |                                                      |                                |
|----------------------------------------|-------------------|------------|-------------------------------------------------------|-------------------------------|---------------------------------|---------------------------------------------|------------------------------------------------------|--------------------------------|
| Cluster                                | AORI_CDs          | location   | predicted domain                                      | products/preliminary products | Orthologs                       | strain                                      | protein                                              | identity%                      |
| <i>nrps1(vcm)</i><br>(P1 in figure 3A) | AORI_1478         | core       | A-T-C-A-T-E-C-A-T                                     | Leu-Tyr-Asn                   | lcl Y16952.3_cdsid_CAC48360.1   | <i>Amycolatopsis balhimycina</i> DSM5908    | peptide synthetase                                   | 81                             |
|                                        | AORI_1479         |            | C-A-T-E-C-A-T-E-C-A-T                                 | Hpg-Hpg-Tyr                   | lcl Y16952.3_cdsid_CAC48361.1   | <i>Amycolatopsis balhimycina</i> DSM5908    | peptide synthetase                                   | 82                             |
|                                        | AORI_1480         |            | C-A-T-C-TE                                            | Dpg                           | lcl Y16952.3_cdsid_CAC48362.1   | <i>Amycolatopsis balhimycina</i> DSM5908    | peptide synthetase                                   | 87                             |
| <i>car</i>                             | AORI_1550         | core       |                                                       | Carotene                      | AMED_4070 ( <i>car</i> )        | <i>Amycolatopsis mediterranei</i> U32       | crtU                                                 | 83                             |
|                                        | AORI_1551         |            |                                                       |                               | AMED_4071                       | <i>Amycolatopsis mediterranei</i> U32       | ubiE                                                 | 80                             |
|                                        | AORI_1552         |            |                                                       |                               | AMED_4072                       | <i>Amycolatopsis mediterranei</i> U32       | lycopene cyclase                                     | 77                             |
|                                        | AORI_1553         |            |                                                       |                               | AMED_4073                       | <i>Amycolatopsis mediterranei</i> U32       | lycopene cyclase                                     | 81                             |
|                                        | AORI_1554         |            |                                                       |                               | AMED_4074                       | <i>Amycolatopsis mediterranei</i> U32       | crtB                                                 | 80                             |
|                                        | AORI_1555         |            |                                                       |                               | AMED_4075                       | <i>Amycolatopsis mediterranei</i> U32       | crtI                                                 | 85                             |
|                                        | AORI_1556         |            |                                                       |                               | AMED_4076                       | <i>Amycolatopsis mediterranei</i> U32       | idsA                                                 | 79                             |
|                                        | <i>pks1(pksE)</i> | AORI_1833  | core                                                  |                               |                                 | AMED_6872 ( <i>pks4</i> )                   | <i>Amycolatopsis mediterranei</i> U32                | enediynes biosynthesis protein |
| AORI_1840                              |                   |            | KS-AT-KR                                              |                               | AMED_6864                       | <i>Amycolatopsis mediterranei</i> U32       | PKS                                                  | 80                             |
| AORI_1843                              |                   |            |                                                       |                               | AMED_6859                       | <i>Amycolatopsis mediterranei</i> U32       | propionyl-CoA carboxylase                            | 48                             |
| <i>lyc</i>                             | AORI_2309         | core       |                                                       | Lycopene                      | AMED_2322 ( <i>lyc</i> )        | <i>Amycolatopsis mediterranei</i> U32       | crtB                                                 | 74                             |
|                                        | AORI_2310         |            |                                                       |                               | AMED_2323                       | <i>Amycolatopsis mediterranei</i> U32       | crtI                                                 | 80                             |
|                                        | AORI_2311         |            |                                                       |                               | AMED_2324                       | <i>Amycolatopsis mediterranei</i> U32       | idsA                                                 | 87                             |
| <i>nrps2</i>                           | AORI_2921         | non core   | C-A-T-C-T-TE-MFS                                      | ?                             | gii271965573 ref YP_003339769.1 | <i>Streptosporangium roseum</i> DSM 43021   | non-ribosomal peptide synthetase-like protein        | 50                             |
|                                        | AORI_2922         |            | A-T-C-A-T-C-A-T                                       | Arg-?-?                       | gii158339498 ref YP_001520887.1 | <i>Acaryochloris marina</i> MBIC11017       | peptide synthetase, putative                         | 35                             |
| <i>pks2(eco)</i>                       | AORI_2945         | non core   | ACP-KS-AT-DH-KR-ACP-KS-AT-DH-ER-KR-ACP                |                               | gii216409659 dbj BAH02268.1     | <i>Streptomyces platensis</i>               | polyketide synthase type I                           | 56                             |
|                                        | AORI_2946         |            | KS-AT-DH-KR-ACP-KS-AT-DH-ER-KR-ACP-KS-AT-DH-ER-KR-ACP |                               | gii345015244 ref YP_004817598.1 | <i>Streptomyces violaceusniger</i> Tu 4113  | polyketide synthase type I                           | 57                             |
|                                        | AORI_2947         |            | KS-AT-DH-KR-ACP                                       |                               | gii15824140 dbj BAB69304.1      | <i>Streptomyces avermitilis</i>             | polyketide synthase type I                           | 55                             |
|                                        | AORI_2948         |            | KS-AT-KR-ACP-KS-AT-DH-KR-ACP                          |                               | gii345011738 ref YP_004814092.1 | <i>Streptomyces violaceusniger</i> Tu 4113  | polyketide synthase type I                           | 55                             |
|                                        | AORI_2949         |            | KS-AT-DH-KR-ACP-KS-AT-DH-KR-ACP-KS-AT-DH-KR-ACP       |                               | gii323435190 gb ADX66472.1      | <i>Streptomyces chattanoogensis</i>         | polyketide synthase type I                           | 57                             |
|                                        | AORI_2950         |            | KS-AT-DH-KR-ACP-TE                                    |                               | gii306407929 dbj BAJ16471.1     | <i>Streptomyces graminofaciens</i>          | polyketide synthase type I                           | 53                             |
| <i>n_p1</i>                            | AORI_3262         | non core   | A-T-KS                                                | Phe                           | gii302867256 ref YP_003835893.1 | <i>Micromonospora aurantiaca</i> ATCC 27029 | adenylation domain-containing protein                | 65                             |
|                                        | AORI_3263         |            | A-T-C-T                                               | Trp                           | gii302867259 ref YP_003835896.1 | <i>Micromonospora aurantiaca</i> ATCC 27029 | adenylation domain-containing protein                | 60                             |
|                                        | AORI_3264         |            | KS-AT-KR-ACP                                          |                               | gii271963948 ref YP_003338144.1 | <i>Streptosporangium roseum</i> DSM 43021   | polyketide/non-ribosomal peptide synthetase          | 64                             |
|                                        | AORI_3265         |            | C-A-T                                                 | Asn                           | gii271963946 ref YP_003338142.1 | <i>Streptosporangium roseum</i> DSM 43021   | non-ribosomal peptide synthetase/polyketide synthase | 58                             |
| <i>pks3</i>                            | AORI_3266         |            | C-A-T-TE-MFS                                          | Ser                           | gii271963945 ref YP_003338141.1 | <i>Streptosporangium roseum</i> DSM 43021   | peptide synthetase                                   | 68                             |
|                                        | AORI_3405         | non core   |                                                       |                               | AMED_3367 ( <i>pks1</i> )       | <i>Amycolatopsis mediterranei</i> U32       | FadD                                                 |                                |
|                                        | AORI_3406         |            | ACP-KS-AT-DH-KR-ACP-TE                                |                               | AMED_3368                       | <i>Amycolatopsis mediterranei</i> U32       | typeI polyketide synthase                            | 67                             |
| <i>nrps3</i>                           | AORI_3539         | non core   | A                                                     | ?                             | gii257056094 ref YP_003133926.1 | <i>Saccharomonospora viridis</i> DSM 43017  | peptide arylation enzyme                             | 81                             |
|                                        | AORI_3547         |            | T                                                     |                               | gii345003770 ref YP_004806624.1 | <i>Streptomyces sp.</i> SirexAA-E           | adenylation domain-containing protein                | 67                             |
| <i>nrps4</i>                           | AORI_3675         | quasi core | C-A-T-C-A-T-C-A-M-T-C-A-T-C-A-T-C-A-T-E               | Ser-Gln-Ser-Thr-Ser-Ala       | gii271964951 ref YP_003339147.1 | <i>Streptosporangium roseum</i> DSM 43021   | non-ribosomal peptide synthetase-like protein        | 61                             |
| <i>nrps5</i>                           | AORI_4035         | non core   | A-T                                                   | ?                             | gii119952361 ref YP_950027.1    | <i>Arthrobacter aurescens</i> TC1           | putative non-ribosomal peptide synthetase            | 56                             |

|               |           |          |                                                     |                     |  |                                 |                                              |                                                                                                       |    |
|---------------|-----------|----------|-----------------------------------------------------|---------------------|--|---------------------------------|----------------------------------------------|-------------------------------------------------------------------------------------------------------|----|
| <i>tps1</i>   | AORI_4062 | non core |                                                     | Terpene             |  | AMED_3240 ( <i>tps2</i> )       | <i>Amycolatopsis mediterranei</i> U32        | terpene synthase                                                                                      | 67 |
| <i>nrps6</i>  | AORI_4540 | non core | C-A-T-C-T-C-A-T                                     | Arg-Ahp             |  | gi 159900486 ref YP_001546733.1 | <i>Herpetosiphon aurantiacus</i> DSM 785     | amino acid adenylation domain-containing g protein amino acid adenylation domain-containing g protein | 35 |
|               | AORI_4541 |          | C-A-T-C-A-T-TE                                      | Thr                 |  | gi 256377653 ref YP_003101313.1 | <i>Actinosynnema mirum</i> DSM 43827         | amino acid adenylation domain-containing g protein                                                    | 39 |
| <i>pks4</i>   | AORI_4645 | non core | KS-AT-DH-ER-KR-ACP-T E                              |                     |  | gi 297153560 gb ADI03272.1      | <i>Streptomyces bingchenggensis</i> BCW-1    | putative type-I PKS                                                                                   | 44 |
| <i>nrps7</i>  | AORI_4675 | non core |                                                     |                     |  | AMED_3103 ( <i>nrps1</i> )      | <i>Amycolatopsis mediterranei</i> U32        | MbH                                                                                                   | 57 |
|               | AORI_4676 |          |                                                     |                     |  | AMED_3106                       | <i>Amycolatopsis mediterranei</i> U32        | MFT                                                                                                   | 71 |
|               | AORI_4677 |          | C-A-T-C-A-T-E-C-A-T-C-A-T-E                         | Trp-Thr-Thr-?       |  | AMED_3105                       | <i>Amycolatopsis mediterranei</i> U32        | NRPS                                                                                                  | 53 |
|               | AORI_4678 |          | A-T-C-A-T-E-C-A-T-E-C-A-T-E-C-A-T                   | Val-Val-Val-Val-Val |  | AMED_3102                       | <i>Amycolatopsis mediterranei</i> U32        | NRPS                                                                                                  | 45 |
| <i>pks5</i>   | AORI_4816 | non core | TE                                                  |                     |  | AMED_4485 ( <i>pks2</i> )       | <i>Amycolatopsis mediterranei</i> U32        | esterase                                                                                              | 79 |
|               | AORI_4818 |          |                                                     |                     |  | AMED_4483                       | <i>Amycolatopsis mediterranei</i> U32        | acyl-CoA synthetase                                                                                   | 77 |
|               | AORI_4819 |          | ACP-KS-AT-ACP-TE                                    |                     |  | AMED_4482                       | <i>Amycolatopsis mediterranei</i> U32        | PKS                                                                                                   | 68 |
| <i>pks6</i>   | AORI_4851 | non core |                                                     |                     |  | AMED_4606 ( <i>pks3</i> )       | <i>Amycolatopsis mediterranei</i> U32        | ACT                                                                                                   | 75 |
|               | AORI_4852 |          | KS-AT                                               |                     |  | AMED_4605                       | <i>Amycolatopsis mediterranei</i> U32        | PKS                                                                                                   | 80 |
|               | AORI_4853 |          | KS-AT-KR                                            |                     |  | AMED_4604                       | <i>Amycolatopsis mediterranei</i> U32        | PKS                                                                                                   | 83 |
| <i>nrps8</i>  | AORI_5017 | non core | A-T-Bacterial transferase hexapeptide (six repeats) | ?                   |  | gi 302527997 ref ZP_07280339.1  | <i>Streptomyces</i> sp. AA4                  | non-ribosomal peptide synthetase                                                                      | 87 |
| <i>n_p2</i>   | AORI_5325 | non core | A-T-TE                                              | ?                   |  | gi 134099557 ref YP_001105218.1 | <i>Saccharopolyspora erythraea</i> NRRL 2338 | non-ribosomal peptide synthetase                                                                      | 45 |
|               | AORI_5330 |          | Chalcone synthases                                  |                     |  | gi 328880541 emb CCA53780.1     | <i>Streptomyces venezuelae</i> ATCC 10712    | Chalcone synthase                                                                                     | 66 |
|               | AORI_5331 |          | C                                                   |                     |  | gi 108762076 ref YP_631821.1    | <i>Myxococcus xanthus</i> DK 1622            | non-ribosomal peptide synthase                                                                        | 39 |
|               | AORI_5337 |          | C                                                   |                     |  | gi 354565110 ref ZP_08984286.1  | <i>Fischerella</i> sp. JSC-11                | amino acid adenylation domain protein                                                                 | 34 |
|               | AORI_5340 |          | A-T-Cy-A-T                                          | ?                   |  | gi 284032053 ref YP_003381984.1 | <i>Kribbella flavida</i> DSM 17836           | amino acid adenylation domain-containing g protein                                                    | 53 |
|               | AORI_5344 |          | A-T                                                 | Me-Pro              |  | gi 284032033 ref YP_003381964.1 | <i>Kribbella flavida</i> DSM 17836           | amino acid adenylation domain-containing g protein                                                    | 44 |
|               | AORI_5345 |          | TE                                                  |                     |  | gi 284032033 ref YP_003381964.1 | <i>Kribbella flavida</i> DSM 17836           | amino acid adenylation domain-containing g protein                                                    | 42 |
|               | AORI_5346 |          | C-T                                                 |                     |  | gi 284032032 ref YP_003381963.1 | <i>Kribbella flavida</i> DSM 17836           | N-(5-amino-5-carboxypentanoyl)-L-cysteiny-D-valine synthase                                           | 44 |
|               | AORI_5347 |          | C-A-T                                               | Phe                 |  | gi 284032030 ref YP_003381961.1 | <i>Kribbella flavida</i> DSM 17836           | amino acid adenylation domain-containing g protein                                                    | 39 |
|               | AORI_5348 |          | TE                                                  |                     |  | gi 302547201 ref ZP_07299543.1  | <i>Streptomyces hygroscopicus</i> ATCC 53653 | pyochelin biosynthetic protein PchC                                                                   | 45 |
|               | AORI_5349 |          | A-T                                                 | Thr                 |  | gi 297197053 ref ZP_06914450.1  | <i>Streptomyces sviveus</i> ATCC 29083       | non-ribosomal peptide synthetase                                                                      | 51 |
| <i>nrps9</i>  | AORI_5362 | non core | TE                                                  |                     |  | gi 330468934 ref YP_004406677.1 | <i>Verrucosiphonia maris</i> AB-18-032       | thioesterase                                                                                          | 37 |
|               | AORI_5363 |          | A-T                                                 | Gln                 |  | gi 556565397 ref YP_008733822.1 | <i>Actinoplanes friuliensis</i>              | non-ribosomal peptide synthetase                                                                      | 45 |
| <i>pks7</i>   | AORI_5390 | non core |                                                     |                     |  | gi 11595497 emb CAC18323.1      | <i>Amycolatopsis</i> sp. HR167               | feruloyl-CoA synthetase                                                                               | 60 |
|               | AORI_5391 |          | A-T-KS-AT-DH-KR-ACP-TE                              |                     |  | gi 297156588 gb ADI06300.1      | <i>Streptomyces bingchenggensis</i> BCW-1    | type I modular polyketide synthase                                                                    | 67 |
|               | AORI_5395 |          |                                                     |                     |  | gi 21225119 ref NP_630898.1     | <i>Streptomyces coelicolor</i> A3(2)         | polyketide synthase                                                                                   | 48 |
|               | AORI_5397 |          | KS-AT-DH-KR-ACP                                     |                     |  | gi 224812393 gb ACN64831.1      | <i>Streptomyces diastatochromogenes</i>      | PokMI                                                                                                 | 48 |
|               | AORI_5398 |          |                                                     |                     |  | gi 217978970 ref YP_002363117.1 | <i>Methylocella silvestris</i> BL2           | putative acyl-CoA dehydrogenase                                                                       | 43 |
| <i>pks8</i>   | AORI_5439 | non core | short chain dehydrogenase-KS-KS*-KR                 |                     |  | gi 311893816 dbj BAJ26224.1     | <i>Kitasatospora setae</i> KM-6054           | putative fatty acid synthase                                                                          | 41 |
|               | AORI_5440 |          | AT-ACP                                              |                     |  | gi 311893815 dbj BAJ26223.1     | <i>Kitasatospora setae</i> KM-6054           | beta-ketoacyl synthase                                                                                | 42 |
| <i>n_p3</i>   | AORI_5501 | non core | short chain dehydrogenase-KS-KS*                    |                     |  | gi 167840976 ref ZP_02467660.1  | <i>Burkholderia thailandensis</i> MSMB43     | polyketide synthase, putative                                                                         | 43 |
|               | AORI_5502 |          | KR-DH-KR                                            |                     |  | gi 167840976 ref ZP_02467660.1  | <i>Burkholderia thailandensis</i> MSMB43     | polyketide synthase, putative                                                                         | 34 |
|               | AORI_5505 |          | ACP                                                 |                     |  | gi 291435672 ref ZP_06575062.1  | <i>Streptomyces ghanaensis</i> ATCC 14672    | acyl carrier protein                                                                                  | 45 |
|               | AORI_5506 |          | A                                                   | ?                   |  | gi 45580865 emb CAG15025.1      | <i>Actinoplanes teichomyceticus</i>          | adenylation protein                                                                                   | 45 |
| <i>nrps10</i> | AORI_6000 | core     | A-T-TE                                              | ?                   |  | gi 302545361 ref ZP_07297703.1  | <i>Streptomyces hygroscopicus</i> ATCC 53653 | non-ribosomal peptide synthetase                                                                      | 61 |



|                                  |           |      |     |         |                                 |                                        |                                                                |    |
|----------------------------------|-----------|------|-----|---------|---------------------------------|----------------------------------------|----------------------------------------------------------------|----|
|                                  | AORI_6001 |      | TE  |         | gi 337769426 emb CCB78139.1     | <i>Streptomyces cattleya</i> NRRL 8057 | esterase                                                       | 49 |
| <i>pks9</i><br>(P4 in figure 3A) | AORI_6604 | core | KS* |         | gi 330465416 ref YP_004403159.1 | <i>Verrucospora maris</i> AB-18-032    | beta-ketoacyl synthase                                         | 53 |
|                                  | AORI_6605 |      | KS  |         | gi 145595315 ref YP_001159612.1 | <i>Salinispora tropica</i> CNB-440     | beta-ketoacyl synthase                                         | 60 |
|                                  | AORI_6606 |      | KS* |         | gi 145595316 ref YP_001159613.1 | <i>Salinispora tropica</i> CNB-440     | beta-ketoacyl synthase                                         | 56 |
|                                  | AORI_6607 |      | KS  |         | gi 145595317 ref YP_001159614.1 | <i>Salinispora tropica</i> CNB-440     | beta-ketoacyl synthase                                         | 74 |
|                                  | AORI_6608 |      | ACP |         | gi 330465412 ref YP_004403155.1 | <i>Verrucospora maris</i> AB-18-032    | phosphopantetheine-binding protein                             | 63 |
|                                  | AORI_6609 |      |     |         | gi 145595319 ref YP_001159616.1 | <i>Salinispora tropica</i> CNB-440     | beta-hydroxyacyl-(acyl-carrier-protein) dehydratase, FabA/FabZ | 67 |
|                                  | AORI_6610 |      |     |         | gi 330465410 ref YP_004403153.1 | <i>Verrucospora maris</i> AB-18-032    | 3-hydroxyacyl-ACP dehydratase                                  | 52 |
|                                  | AORI_6611 |      |     |         | gi 145595321 ref YP_001159618.1 | <i>Salinispora tropica</i> CNB-440     | 3-oxoacyl-(acyl-carrier-protein) reductase                     | 73 |
|                                  | AORI_6613 |      |     |         | gi 330465407 ref YP_004403150.1 | <i>Verrucospora maris</i> AB-18-032    | acetyl-CoA acetyltransferase                                   | 74 |
|                                  | AORI_6614 |      |     |         | gi 330465392 ref YP_004403135.1 | <i>Verrucospora maris</i> AB-18-032    | acyl-CoA dehydrogenase                                         | 69 |
|                                  | AORI_6615 |      |     |         | gi 330465391 ref YP_004403134.1 | <i>Verrucospora maris</i> AB-18-032    | domain-containing protein acyl-CoA dehydrogenase               | 53 |
| <i>tps2</i>                      | AORI_7417 | core |     | Terpene | AMED_1325 ( <i>tps1</i> )       | <i>Amycolatopsis mediterranei</i> U32  | terpene synthase                                               | 55 |

Note: All of the polyketide synthases, the nonribosomal peptide-synthetases, or the terpene synthases in total 26 biosynthetic gene clusters were employed to run the BLASTP program comparing against to the NCBI database and the best hits information was listed. The domain organization of PKS/NRPS enzymes and the putative precursors of NRPSs are analyzed on the SBSPKS or NRPSDB database. Nine clusters of *car*, *pks1*, *lyc*, *pks3*, *tps1*, *nrps7*, *pks5*, *pks6* and *tps2* have their orthologs in the *A. mediterranei* genome with the highest hitting scores, respectively.

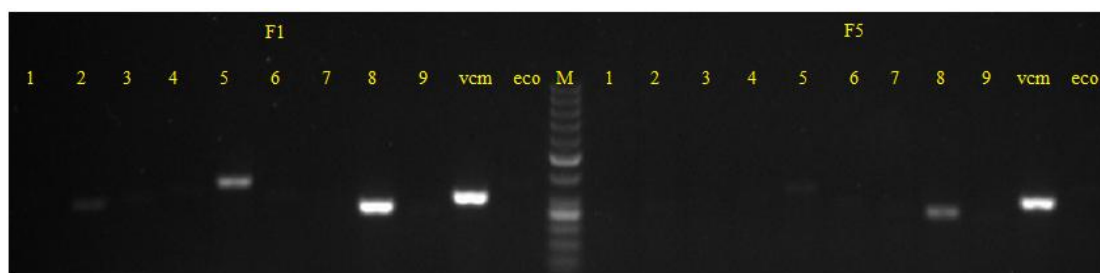

**Figure S5. The reverse-transcription PCR of RNA isolated from different cultures (poor medium F1 and rich medium F5).** Line 1 to 9 represents the genes of *nrps3*, *nrps4*, *nrps7*, *n\_p1*, *n\_p2*, *n\_p3*, *pks3*, *pks5*, *pks9*, respectively. Line *vcm* and *eco* represent the genes of vancomycin biosynthetic cluster and *eco* polyketide cluster.

**Table S6. Genes encoded for racemases in *A.orientalis* HCCB10007 genome**

| <b>AORI_CDS</b> | <b>Strand</b> | <b>Racemase_name</b>                                           | <b>Location</b>   |
|-----------------|---------------|----------------------------------------------------------------|-------------------|
| AORI_0075       | +             | amino acid aldolase or racemase                                | core region       |
| AORI_0725       | +             | alanine racemase                                               | core region       |
| AORI_2199       | -             | fatty acid-CoA racemase                                        | core region       |
| AORI_2442       | +             | alpha-methylacyl-CoA racemase                                  | core region       |
| AORI_3621       | +             | proline racemase                                               | non-core region   |
| AORI_4003       | +             | mandelate racemase/muconate lactonizing<br>enzyme-like protein | non-core region   |
| AORI_5039       | +             | Asp/Glu/hydantoin racemase                                     | quasi-core region |
| AORI_6044       | -             | mandelate racemase                                             | core region       |
| AORI_6304       | +             | enoyl-CoA hydratase/carnithine racemase                        | core region       |
| AORI_6488       | -             | glutamate racemase                                             | core region       |
| AORI_6491       | -             | aspartate racemase                                             | core region       |

**Table S7. NMR spectroscopic data for dimethylvancomycin (see the chemical structural formula below)**

| dimethylvancomycin <sup>a</sup> |                        |                     | vancomycin <sup>b</sup> |                     |                     | group                 |
|---------------------------------|------------------------|---------------------|-------------------------|---------------------|---------------------|-----------------------|
| NO.                             | $\delta_{\text{H}}$    | $\delta_{\text{C}}$ | NO.                     | $\delta_{\text{H}}$ | $\delta_{\text{C}}$ |                       |
| 1                               | 1.18 (d, 6.3)          | 18.4                | 1                       | /                   | /                   | CH <sub>3</sub>       |
| 2                               | 0.96 (d, 6.3)          | 22.7                | 2                       | /                   | /                   | CH <sub>3</sub>       |
| 3                               | 0.92 (d, 6.1)          | 23.2                | 3                       | /                   | /                   | CH <sub>3</sub>       |
| 4                               | 1.17 (s)               | 24.5                | 4                       | /                   | /                   | CH <sub>3</sub>       |
| 5                               | 1.28 (m 7.4)           | 26.8                | 5                       | /                   | /                   | CH                    |
| 6                               | 2.14 (br m)            | 35.4                | 6                       | /                   | /                   | CH <sub>2</sub>       |
|                                 | 2.38 (br d, 7.3)       |                     |                         |                     |                     |                       |
| 7                               | 1.83 (br d, 14.8, 5.6) | 37.9                | 7                       | /                   | /                   | CH <sub>2</sub>       |
|                                 | 2.29 (br m)            |                     |                         |                     |                     |                       |
| 8                               | 1.52 (m)               | 38.8                | 8                       | /                   | /                   | CH <sub>2</sub>       |
|                                 | 1.69 (m)               |                     |                         |                     |                     |                       |
| 8'                              | 2.91 (s)               | 43.9                | 8'                      | 2.37(s)             | 33.2                | CH <sub>3</sub>       |
| <b>8''</b>                      | <b>2.91(s)</b>         | <b>43.9</b>         | <b>c</b>                | –                   | –                   | <b>CH<sub>3</sub></b> |
| 9                               | 3.2 (br m)             | 49.3                | 9                       | /                   | /                   | CH                    |
| 10                              | 3.82 (m)               | 63.3                | 10                      | /                   | /                   | CH                    |
| 11                              | 4.78 (s)               | 54.0                | 11                      | /                   | /                   | CH                    |
| 12                              |                        | 56.5                | 12                      | /                   | /                   | C                     |
| 13                              | 4.56 (s)               | 57.1                | 13                      | /                   | /                   | CH                    |
| 14                              | 5.84 (s)               | 57.6                | 14                      | /                   | /                   | CH                    |
| 15                              | 5.58 (m)               | 61.0                | 15                      | /                   | /                   | CH                    |
| 16                              | 5.40 (dd, 16.3, 7.6)   | 62.1                | 16                      | /                   | /                   | CH                    |
|                                 | 5.58(m)                |                     |                         |                     |                     |                       |
| 17                              | 5.56(m)                | 62.9                | 17                      | /                   | /                   | CH                    |
| 18                              | 3.65 (m)               | 71.9                | 18                      | /                   | /                   | CH                    |
| 19                              | 4.83 (br d, 1.0)       | 73.2                | 19                      | /                   | /                   | CH                    |
| 20                              | 4.92(br d, 11.5)       | 73.8                | 20                      | /                   | /                   | CH                    |
| 21                              | 4.85(o)                | 74.0                | 21                      | /                   | /                   | CH                    |
| 22                              | 4.82 (o)               | 74.1                | 22                      | /                   | /                   | CH                    |
| 23                              | 5.40 (m)               | 78.5                | 23                      | /                   | /                   | CH                    |
| 24                              | 5.38 (m)               | 79.0                | 24                      | /                   | /                   | CH                    |
| 25                              | 4.82 (o)               | 81.6                | 25                      | /                   | /                   | CH                    |
| 26                              | 4.85 (o)               | 100.0               | 26                      | /                   | /                   | CH                    |
| 27                              | 5.41 (m)               | 103.8               | 27                      | /                   | /                   | CH                    |
| 28                              | 6.32 (d, 2.1)          | 105.4               | 28                      | /                   | /                   | CH                    |
| 29                              | 5.25 (d, 1.4)          | 108.3               | 29                      | /                   | /                   | CH                    |
| 30                              | 6.58 (d, 2.1)          | 107.0               | 30                      | /                   | /                   | CH                    |
| 31                              | 5.45 (m)               | 108.3               | 31                      | /                   | /                   | CH                    |
| 32                              | 6.70 (d, 8.2)          | 120.1               | 32                      | /                   | /                   | CH                    |

|    |               |       |    |   |   |    |
|----|---------------|-------|----|---|---|----|
| 33 |               | 120.6 | 33 | / | / | C  |
| 34 |               | 123.8 | 34 | / | / | C  |
| 35 | 7.35 (d, 8.1) | 125.2 | 35 | / | / | CH |
| 36 | 7.24 (d, 8.2) | 126.2 | 36 | / | / | CH |
| 37 | 6.58 (d, 8.1) | 126.8 | 37 | / | / | CH |
| 38 |               | 127.8 | 38 | / | / | C  |
| 39 |               | 128.6 | 39 | / | / | C  |
| 40 |               | 128.7 | 40 | / | / | C  |
| 41 | 7.73 (d, 8.2) | 129.0 | 41 | / | / | CH |
| 42 | 7.71 (d, 8.2) | 129.7 | 42 | / | / | CH |
| 43 | 7.76 (s)      | 130.2 | 43 | / | / | CH |
| 44 | 7.61 (s)      | 130.6 | 44 | / | / | CH |
| 45 |               | 131.2 | 45 | / | / | C  |
| 46 |               | 131.6 | 46 | / | / | C  |
| 47 | 7.47 (br s)   | 135.0 | 47 | / | / | CH |
| 48 |               | 138.0 | 48 | / | / | C  |
| 49 |               | 140.7 | 49 | / | / | C  |
| 50 |               | 141.1 | 50 | / | / | C  |
| 51 |               | 142.5 | 51 | / | / | C  |
| 52 |               | 142.9 | 52 | / | / | C  |
| 53 |               | 144.5 | 53 | / | / | C  |
| 54 |               | 151.5 | 54 | / | / | C  |
| 55 |               | 153.1 | 55 | / | / | C  |
| 56 |               | 155.2 | 56 | / | / | C  |
| 57 |               | 156.7 | 57 | / | / | C  |
| 58 |               | 157.3 | 58 | / | / | C  |
| 59 |               | 158.9 | 59 | / | / | C  |
| 60 |               | 170.4 | 60 | / | / | C  |
| 61 |               | 170.5 | 61 | / | / | C  |
| 62 |               | 173.0 | 62 | / | / | C  |
| 63 |               | 173.5 | 63 | / | / | C  |
| 64 |               | 176.6 | 64 | / | / | C  |
| 65 |               | 179.1 | 65 | / | / | C  |

a: <sup>1</sup>H-NMR was measured at 500 MHz in D<sub>2</sub>O, and <sup>13</sup>C-NMR was measured at 125 MHz in D<sub>2</sub>O.

b: The NMR data for vancomycin was studied by Pearce (1995).

c: Compared with that of vancomycin, the NMR data for dimethylvancomycin shows another methyl-group at the position of 8'' was added.

-: absent; /: identical

**Table S8. NMR spectroscopic data for dimethylglucovancomycin (see the chemical structural formula below)**

| dimethylglucovancomycin <sup>a</sup> |                                 |                     | vancomycin <sup>b</sup> |                     |                     |                       |
|--------------------------------------|---------------------------------|---------------------|-------------------------|---------------------|---------------------|-----------------------|
| NO.                                  | $\delta_{\text{H}}$             | $\delta_{\text{C}}$ | NO.                     | $\delta_{\text{H}}$ | $\delta_{\text{C}}$ | group                 |
| 1                                    | 0.87 (d, 3.0)                   | 22.7                | 1                       | /                   | /                   | CH <sub>3</sub>       |
| 2                                    | 0.86 (d, 2.96)                  | 23.8                | 2                       | /                   | /                   | CH <sub>3</sub>       |
| 3                                    | 1.64(m)                         | 25.4                | 3                       | /                   | /                   | CH                    |
| 4                                    | 1.27(m) 1.55(m)                 | 35.8                | 4                       | /                   | /                   | CH <sub>2</sub>       |
| 5                                    | 2.12(dd,16.24, 5.05)<br>2.29(m) | 39.3                | 5                       | /                   | /                   | CH <sub>2</sub>       |
| 5'                                   | 2.29(s)                         | 42.2                | 5'                      | 2.37(s)             | 33.2                | CH <sub>3</sub>       |
| <b>5''</b>                           | <b>2.29(s)</b>                  | <b>42.2</b>         | <b>c</b>                | <b>-</b>            | <b>-</b>            | <b>CH<sub>3</sub></b> |
| 6                                    | 4.49(m)                         | 51.3                | 6                       | /                   | /                   | CH                    |
| 7                                    | 4.43 (d, 5.68)                  | 55.0                | 7                       | /                   | /                   | CH                    |
| 8                                    | 4.45(s)                         | 57.2                | 8                       | /                   | /                   | CH                    |
| 9                                    | 4.18 (d, 11.96)                 | 62.3                | 9                       | /                   | /                   | CH                    |
| 10                                   | 4.88(q)                         | 58.7                | 10                      | /                   | /                   | CH                    |
| 11                                   | 3.03(m)                         | 67.1                | 11                      | /                   | /                   | CH                    |
| 12                                   | 5.71(s)                         | 54.2                | 12                      | /                   | /                   | CH                    |
| 13                                   | 5.19 (d, 4.32)                  | 71.3                | 13                      | /                   | /                   | CH                    |
| 14                                   | 5.10 (d, 5.56)                  | 72.1                | 14                      | /                   | /                   | CH                    |
| 15                                   | 6.40 (d, 1.92)                  | 102.8               | 15                      | /                   | /                   | CH                    |
| 16                                   | 5.20 (d, 4.32)                  | 104.9               | 16                      | /                   | /                   | CH                    |
| 17                                   | 6.27(s)                         | 106.2               | 17                      | /                   | /                   | CH                    |
| 18                                   | 5.50(s)                         | 107.3               | 18                      | /                   | /                   | CH                    |
| 19                                   | 6.71 (d, 8.6)                   | 116.7               | 19                      | /                   | /                   | CH                    |
| 20                                   |                                 | 118.5               | 20                      | /                   | /                   | C                     |
| 21                                   |                                 | 122.1               | 21                      | /                   | /                   | C                     |
| 22                                   | 7.22 (d, 15.36)                 | 123.8               | 22                      | /                   | /                   | CH                    |
| 23                                   | 7.33 (d, 8.36)                  | 125.0               | 23                      | /                   | /                   | CH                    |
| 24                                   | 6.78 (d, 8.6)                   | 126.0               | 24                      | /                   | /                   | CH                    |
| 25                                   |                                 | 126.6               | 25                      | /                   | /                   | C                     |
| 26                                   |                                 | 126.8               | 26                      | /                   | /                   | C                     |
| 27                                   |                                 | 127.5               | 27                      | /                   | /                   | C                     |
| 28                                   | 7.46 (dd, 15.36,8.36)           | 127.6               | 28                      | /                   | /                   | CH                    |
| 29                                   | 7.50 (dd, 15.36, 8.36)          | 127.8               | 29                      | /                   | /                   | CH                    |
| 30                                   | 7.83(s)                         | 128.0               | 30                      | /                   | /                   | CH                    |
| 31                                   | 7.28(m)                         | 128.7               | 31                      | /                   | /                   | CH                    |
| 32                                   |                                 | 129.3               | 32                      | /                   | /                   | C                     |
| 33                                   |                                 | 134.4               | 33                      | /                   | /                   | C                     |
| 34                                   | 7.18(s)                         | 136.1               | 34                      | /                   | /                   | CH                    |
| 35                                   |                                 | 136.7               | 35                      | /                   | /                   | C                     |

|    |       |    |   |   |   |
|----|-------|----|---|---|---|
| 36 | 140.0 | 36 | / | / | C |
| 37 | 142.6 | 37 | / | / | C |
| 38 | 147.8 | 38 | / | / | C |
| 39 | 148.0 | 39 | / | / | C |
| 40 | 149.4 | 40 | / | / | C |
| 41 | 151.0 | 41 | / | / | C |
| 42 | 155.5 | 42 | / | / | C |
| 43 | 157.0 | 43 | / | / | C |
| 44 | 157.6 | 44 | / | / | C |
| 45 | 168.1 | 45 | / | / | C |
| 46 | 168.3 | 46 | / | / | C |
| 47 | 169.7 | 47 | / | / | C |
| 48 | 170.8 | 48 | / | / | C |
| 49 | 171.0 | 49 | / | / | C |
| 50 | 171.1 | 50 | / | / | C |
| 51 | 172.5 | 51 | / | / | C |
| 52 | 173.0 | 52 | / | / | C |

a:  $^1\text{H-NMR}$  was measured at 400 MHz in  $\text{DMSO-}d_6$ , and  $^{13}\text{C-NMR}$  was measured at 100 MHz in  $\text{DMSO-}d_6$ .

b: The NMR data for vancomycin was studied by Pearce (1995).

c: Compared with that of vancomycin, the NMR data for dimethylglucovancomycin shows another methyl-group at the position of 5'' was added. Differences include the lack of a glucosyl- group and a vancosamine- group in dimethylglucovancomycin (data not shown).

-: absent; /: identical

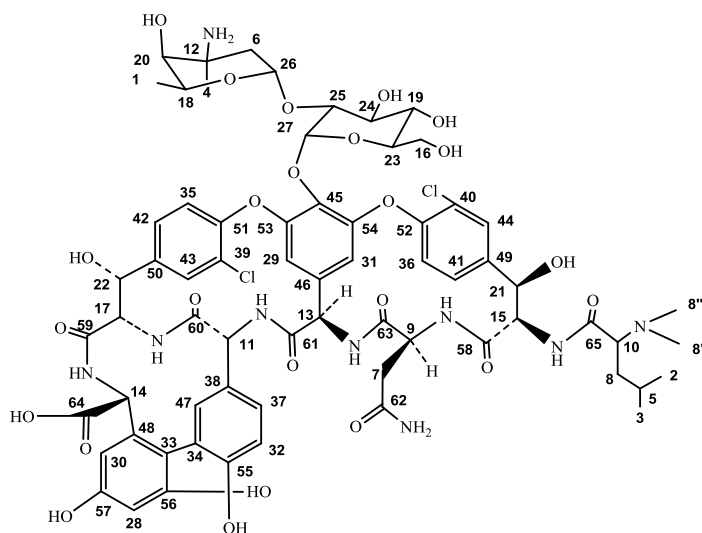

dimethylvancomycin

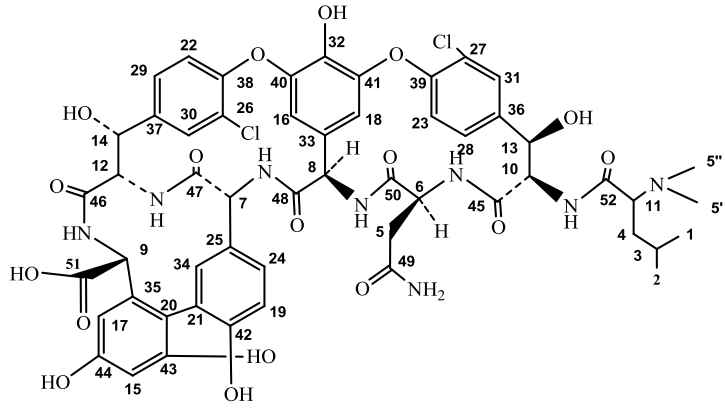

dimethylglucovancomycin
